# Supplementary material for: The NSUN5-FTH1/FTL pathway mediates ferroptosis in bone marrow-derived mesenchymal stem cells
Source: PubMed Central journal article supplement (PMC8898311; doi:10.1038/s41420-022-00902-z), 2022-03-05
Supplement: 41420_2022_902_MOESM1_ESM.pdf [file 41420_2022_902_MOESM1_ESM.pdf]

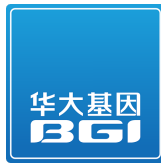

# Identification Proteomics Report

2019/5/22

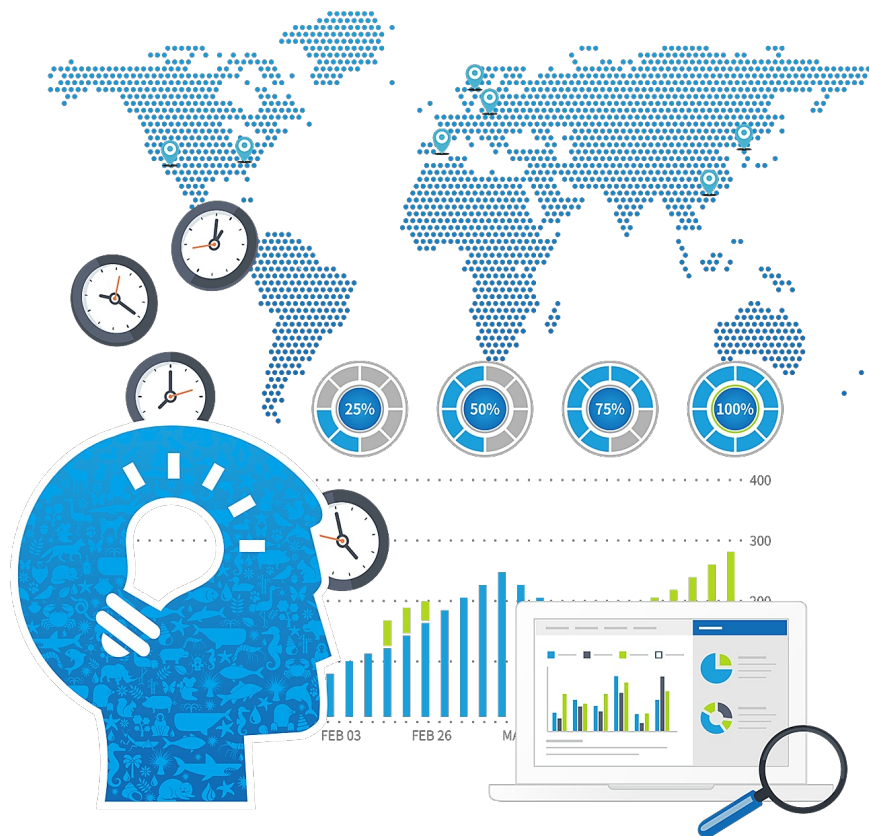

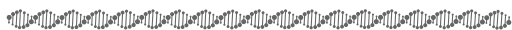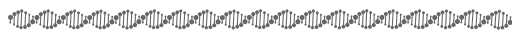

# 目 录

|                        |           |
|------------------------|-----------|
| <b>分析结果</b>            | <b>2</b>  |
| 1 蛋白鉴定结果               | 2         |
| 2 功能分析                 | 8         |
| <b>分析方法</b>            | <b>10</b> |
| 1 实验流程                 | 10        |
| 2 信息分析流程               | 12        |
| <b>帮助</b>              | <b>14</b> |
| 1 mgf数据格式说明            | 14        |
| 2 数据目录编排说明             | 14        |
| 3 蛋白质序列FASTA格式         | 15        |
| 4 peptideSummary文件格式说明 | 15        |
| 5 proteinSummary文件格式说明 | 16        |
| 6 GO功能注释说明             | 16        |
| 7 COG功能注释说明            | 17        |
| 8 Pathway通路注释说明        | 18        |
| <b>常见问题</b>            | <b>19</b> |
| <b>参考文献</b>            | <b>19</b> |

## ● 分析结果

### 1 蛋白鉴定结果

#### 1.1 概述

本项目所用质谱仪器是 Triple TOF 5600。样品组nsun5\_co-ip\_control中共得到谱图31265张，通过搜索引擎完成鉴定后，匹配到的谱图数量是3904张，共鉴定到446个蛋白，1228个肽段。样品组n5\_co-iperastin\_erastin中共得到谱图28295张，通过搜索引擎完成鉴定后，匹配到的谱图数量是884张，共鉴定到133个蛋白，337个肽段。

表1 鉴定结果概览 (下载)

| Sample                  | Total_spectra | Identified_spectra | Identified_peptides | Identified_proteins |
|-------------------------|---------------|--------------------|---------------------|---------------------|
| nsun5_co-ip_control     | 31265         | 3904               | 1228                | 446                 |
| n5_co-iperastin_erastin | 28295         | 884                | 337                 | 133                 |

#### 1.2 基本统计图

下面为蛋白鉴定结果的基本统计图，分别从“唯一谱图分布”，“唯一肽段分布”，“蛋白质量分布”，“蛋白覆盖度分布”以及“肽段长度分布”五个方面分别进行绘制。

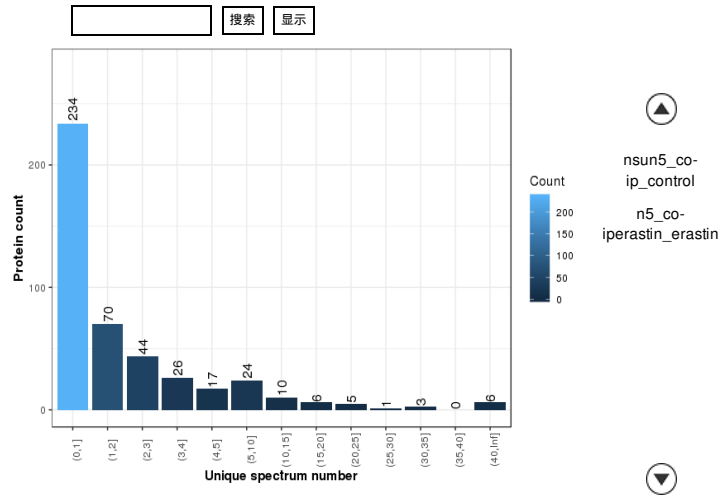

图1 唯一谱图分布。

横轴为每个蛋白的唯一匹配谱图数，纵轴为蛋白数目

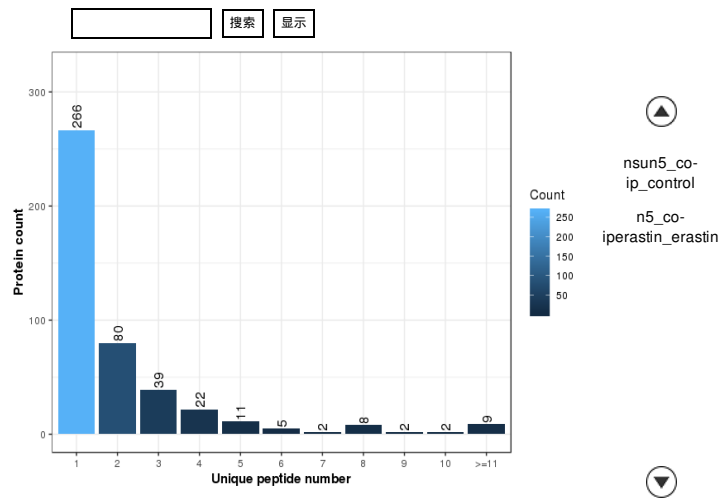

图2 唯一肽段分布。

横轴为每个蛋白的唯一匹配肽段数，纵轴为蛋白数目

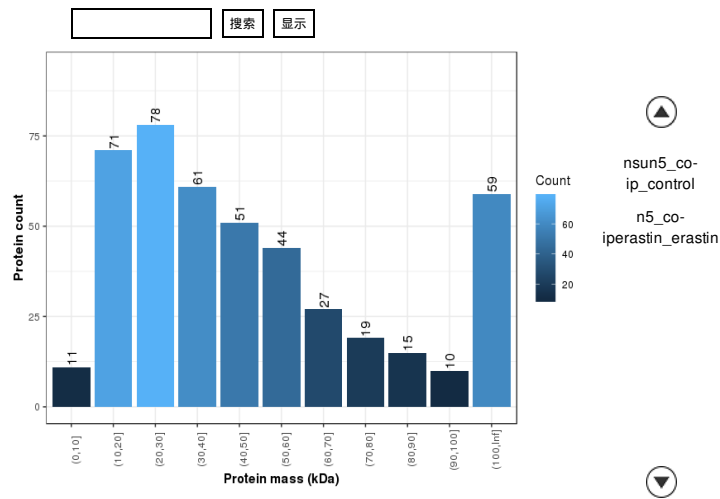

图3 蛋白质质量分布。

横轴为蛋白质质量区间 (Kilodalton)，纵轴为相应蛋白数目

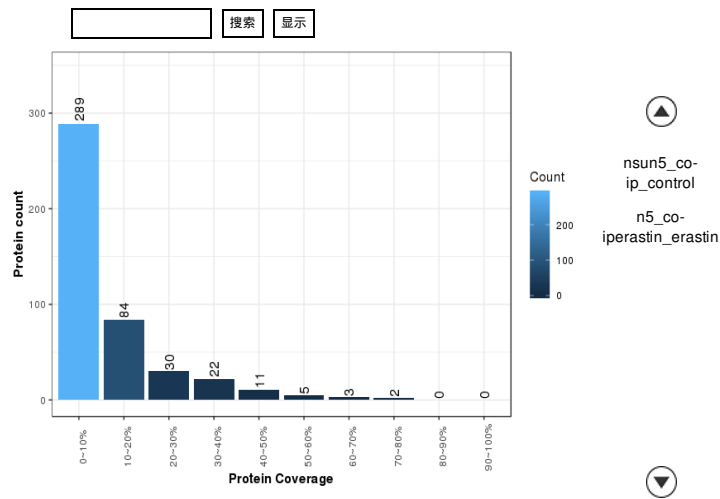

图4 蛋白覆盖度分布。

横轴为蛋白覆盖度百分比区间，纵轴为蛋白数目

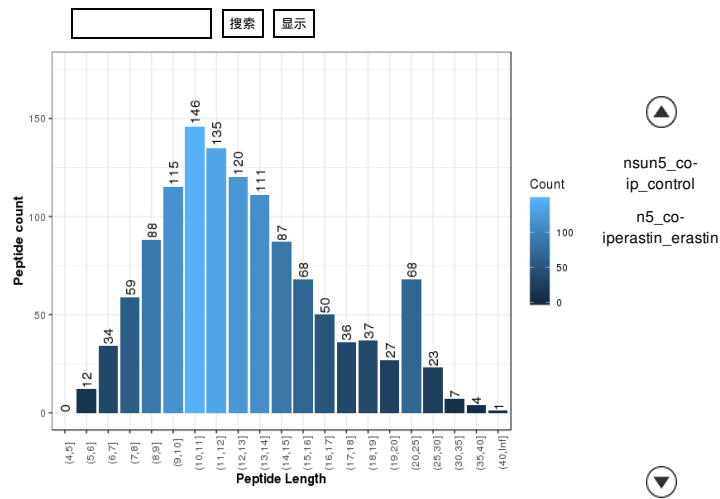

图5 肽段长度分布。

横轴为每个肽段的长度区间（残基个数），纵轴为相应肽段数目

### 1.3 详细鉴定列表

以下为各样品“谱图鉴定列表”，“肽段鉴定列表”和“蛋白鉴定列表”，每个列表只预览前10行。完整列表可通过各列表的“[查看全部](#)”按钮进行查看。

表2 谱图鉴定列表:nsun5\_co-ip\_control ([查看全部](#))

| query_number | peptide_seq                    | PSM_FDR | ions_score | Protein_ID                     |
|--------------|--------------------------------|---------|------------|--------------------------------|
| 29687        | TTGIVMDSGDGVTHTVPIYEGYALPHAILR | 0       | 4.41629    | sp P60711 ACTB_RAT;sp P63259 A |
| 29691        | TTGIVMDSGDGVTHTVPIYEGYALPHAILR | 0       | 4.20809    | sp P60711 ACTB_RAT;sp P63259 A |
| 29688        | TTGIVMDSGDGVTHTVPIYEGYALPHAILR | 0       | 4.20223    | sp P60711 ACTB_RAT;sp P63259 A |
| 29789        | TTGIVMDSGDGVTHTVPIYEGYALPHAILR | 0       | 4.19918    | sp P60711 ACTB_RAT;sp P63259 A |
| 29790        | TTGIVMDSGDGVTHTVPIYEGYALPHAILR | 0       | 4.18953    | sp P60711 ACTB_RAT;sp P63259 A |
| 29698        | TTGIVMDSGDGVTHTVPIYEGYALPHAILR | 0       | 4.03837    | sp P60711 ACTB_RAT;sp P63259 A |
| 29686        | TTGIVMDSGDGVTHTVPIYEGYALPHAILR | 0       | 3.95992    | sp P60711 ACTB_RAT;sp P63259 A |
| 29680        | TTGIVMDSGDGVTHTVPIYEGYALPHAILR | 0       | 3.72921    | sp P60711 ACTB_RAT;sp P63259 A |
| 29697        | TTGIVMDSGDGVTHTVPIYEGYALPHAILR | 0       | 3.67943    | sp P60711 ACTB_RAT;sp P63259 A |
| 29685        | TTGIVMDSGDGVTHTVPIYEGYALPHAILR | 0       | 3.6555     | sp P60711 ACTB_RAT;sp P63259 A |

表3 谱图鉴定列表:n5\_co-iperastin\_erastin (查看全部)

| query_number | peptide_seq                    | PSM_FDR | ions_score | Protein_ID                      |
|--------------|--------------------------------|---------|------------|---------------------------------|
| 27151        | TTGIVMDSGDGVTHTVPIYEGYALPHAILR | 0       | 3.64919    | sp P60711 ACTB_RAT;sp P63259 A  |
| 18953        | LQQLDLDLVDLHQR                 | 0       | 3.41272    | sp Q62812 MYH9_RAT;tr G3V6P7 C  |
| 26387        | GIYETPAGTILYHAHLIDIEAFTMDR     | 0       | 3.08284    | sp P09034 ASSY_RAT              |
| 27152        | TTGIVMDSGDGVTHTVPIYEGYALPHAILR | 0       | 2.98041    | sp P60711 ACTB_RAT;sp P63259 A  |
| 22873        | QPVAVSELAGHQTSAESWGTR          | 0       | 2.85765    | sp P50878 RL4_RAT;tr Q6P3V9 Q6I |
| 11880        | QEYDESGPSIVHR                  | 0       | 2.8465     | sp P60711 ACTB_RAT;sp P63259 A  |
| 15049        | NFINNPLAQADWAAK                | 0       | 2.71754    | tr G3V6P7 G3V6P7_RAT            |
| 18952        | LQQLDLDLVDLHQR                 | 0       | 2.70664    | sp Q62812 MYH9_RAT;tr G3V6P7 C  |
| 18197        | VLDFEHFLPMLQTVAK               | 0       | 2.56592    | sp Q64119 MYL6_RAT;tr A0A0G2 J  |
| 21158        | FHSDWCSPNCDEIHDR               | 0       | 2.39667    | sp Q99MU5 SPAT6_RAT;tr B0BMV    |

表4 肽段鉴定列表:nsun5\_co-ip\_control (查看全部)

| Peptide               | Modification       | Query                                                                    |
|-----------------------|--------------------|--------------------------------------------------------------------------|
| ALELDSNLYR            | -                  | 4840;4838;4839;4835;4821;4822                                            |
| IAQLEEELEEEQSNMELLNDR | Oxidation (M)@15M  | 27201                                                                    |
| YAFVNWINK             | -                  | 3982                                                                     |
| YLTVAAVFR             | -                  | 2337;2335                                                                |
| LENEIQTYR             | -                  | 4223;4224                                                                |
| HQGVVMGMGQK           | -                  | 4341;4342;4339;4333;4337;4325;4332;4340;180;4324;4336;4331;4335;4343;433 |
| IEIAQK                | Deamidated (NQ)@5Q | 5                                                                        |
| GWDEVVYYTVPLVR        | -                  | 16280                                                                    |
| LLLNNDNLLR            | Deamidated (NQ)@4N | 4926                                                                     |
| LAAMATLLAR            | -                  | 2220                                                                     |

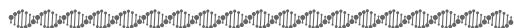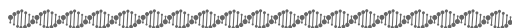

表5 肽段鉴定列表:n5\_co-iperastin\_erastin (查看全部)

| Peptide                        | Modification           | Query                         | Group_ID | Group_Pri   |
|--------------------------------|------------------------|-------------------------------|----------|-------------|
| ATDAEADVASLNR                  | -                      | 7876                          | 15_4     | tr A0A0G2K  |
| LENEIQTYR                      | -                      | 4513                          | 14_7     | tr A0A0G2K  |
| LAAMATLLAR                     | -                      | 2439                          | 70_1     | tr G3V660 C |
| AGFAGDDAPR                     | -                      | 1559                          | 36_4     | sp P63259 f |
| TTGIVMDSGDGVTHTVPIYEGYALPHAILR | Oxidation (M)@6M       | 27191;27192;27190;27193;27194 | 36_4     | sp P63259 f |
| IIGLDQVAGMSETALPGAFK           | Oxidation (M)@10M      | 19994                         | 8_2      | tr G3V6P7 C |
| DETVSDCSPHIANIGR               | Carbamidomethyl (C)@7C | 16688                         | 84_1     | tr A0A0G2J' |
| GQTGGDVNVEMDAAPGVDLSR          | Deamidated (NQ)@8N     | 20497                         | 14_1     | tr A0A0G2J  |
| LISWYDNEYGYSNR                 | Deamidated (NQ)@7N     | 16782                         | 3_1      | tr M0R590 M |
| ELAPYDENWFYTR                  | -                      | 15551                         | 50_1     | tr A0A0H2U  |

表6 蛋白鉴定列表:nsun5\_co-ip\_control (查看全部)

| Group_ID | Protein_ID          | Protein_Qscore | Protein_FDR | Protein_Mass  | PeptideSeqs     |
|----------|---------------------|----------------|-------------|---------------|-----------------|
| 327_1    | sp P35427 RL13A_RAT | 4.52507894392  | NA          | 23461.3867047 | YQAVTATLEEK     |
| 332_1    | sp Q4KM74 SC22B_RAT | 2.63020205857  | NA          | 24724.7498547 | NLGSINTELQDVQ   |
| 381_1    | sp P62836 RAP1A_RAT | 4.52507894392  | NA          | 20973.7076847 | INVNEIFYDLVR    |
| 329_1    | sp P42123 LDHB_RAT  | 6.80351988031  | NA          | 36589.0651547 | FIIPQIVK;SLADEL |
| 229_1    | sp P45592 COF1_RAT  | 7.2188709248   | NA          | 18520.6679947 | EILVGDVGQTVDD   |

|       |                              |               |    |                  |                |
|-------|------------------------------|---------------|----|------------------|----------------|
| 347_1 | tr B2RYW7 B2RYW7_RAT         | 2.00358778917 | NA | 12501.7694247    | VLLESEQFLTELTF |
| 387_1 | sp P04762 CATA_RAT           | 2.16737496737 | NA | 59719.4848147001 | EAETFPFNPFDLTI |
| 136_1 | tr M0R979 M0R979_RAT         | 2.63020205857 | NA | 126960.446044701 | QVTQSYWDTNPT   |
| 330_1 | tr D4A5I9 D4A5I9_RAT         | 14.6807109613 | NA | 148037.6646847   | IVEANPLLEAFGN/ |
| 345_1 | tr A0A0G2K0Y0 A0A0G2K0Y0_RAT | 2.1769962896  | NA | 93508.5790547005 | EGTAMLLEHLAGE  |

表7 蛋白鉴定列表:n5\_co-iperastin\_erastin (查看全部)

| Group_ID | Protein_ID           | Protein_Qscore | Protein_FDR | Protein_Mass     | PeptideSeqs     |
|----------|----------------------|----------------|-------------|------------------|-----------------|
| 43_2     | tr D4A4S3 D4A4S3_RAT | 7.79248831333  | NA          | 70683.0487347003 | FEELNADLFR;IINE |
| 43_1     | sp P06761 BIP_RAT    | 3.89624415667  | NA          | 72302.4294747003 | IINEPTAAAIAYGLI |
| 98_1     | sp B2GUZ5 CAZA1_RAT  | 13.1621457928  | NA          | 32889.3321847    | DVQDSVTVSNEV/   |



|       |                              |               |    |                  |                |
|-------|------------------------------|---------------|----|------------------|----------------|
| 28_1  | tr A0A0G2JVH1 A0A0G2JVH1_RAT | 3.89624415667 | NA | 212519.5337847   | VQVEQQNGLDV    |
| 105_1 | sp P09034 ASSY_RAT           | 3.89624415667 | NA | 46466.8984247    | GIYETPAGTILYHA |
| 1_1   | tr G3V8C3 G3V8C3_RAT         | 15.9697154835 | NA | 53668.0579747001 | ETNLESPLVDTH   |
| 103_1 | sp P06762 HMOX1_RAT          | 2.85485147151 | NA | 32984.8054447    | QRPASLVQDTTS/  |
| 89_1  | tr D3ZFO8 D3ZFO8_RAT         | 3.89624415667 | NA | 35411.9747747    | GLLSSLDHTSIR   |
| 5_1   | tr Q6GMN8 Q6GMN8_RAT         | 7.79248831333 | NA | 102547.3412947   | TINEVENQILTR;V |
| 62_1  | tr Q63747 Q63747_RAT         | 2.1551026504  | NA | 24705.0736246999 | VLGLVLLR       |

## 2 功能分析

### 2.1 GO注释

Gene Ontology(简称GO)是一个国际化的基因功能分类系统，提供了一套动态更新的标准词汇表 (Controlled Vocabulary)来全面描述生物体中基因和基因产物的属性。GO总共有三个本体 (Ontology)，分别描述基因的分子功能 (Molecular Function)、细胞组成 (Cellular Component)、参与的生物过程 (Biological Process)。

详细信息见网站：<http://www.geneontology.org>。

我们针对鉴定出的所有蛋白进行GO功能注释分析，给出的结果包括两部分：protein2go和go2protein。

protein2go：针对每个蛋白，给出所有相应的GO功能的ID列表。

go2protein: 针对三个ontology ( cellular component, biological process, molecular function ) 中所涉及的GO条目, 列出所有相应的蛋白的ID及蛋白个数, 同时做出统计图, 略去没有相应蛋白的GO条目。

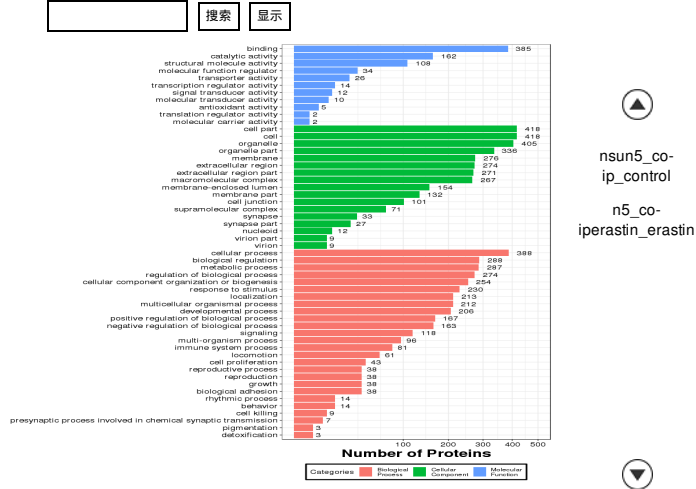

图6 GO功能注释图。

GO分类图显示了三个本体中所涉及到各条目的分布情况, 不同颜色标记为三个本体中涉及到的各个条目。

nsun5\_co-ip\_control样本GO注释结果:[nsun5\_co-ip\_control\_GO.zip]

n5\_co-iperastin\_erastin样本GO注释结果:[n5\_co-iperastin\_erastin\_GO.zip]

@paragraph

### 2.2 KOG注释

Eukaryotic orthologous groups(KOGs)数据库是一种常用的蛋白功能注释数据库。每个KOG条目都包含一系列直系同源蛋白或旁系同源蛋白(Orthologs or Paralogs)。直系同源蛋白是指来自于不同物种的由垂直家系 (物种形成) 进化而来的蛋白, 并且典型地保留与原始蛋白有相同的功能。旁系同源蛋白是那些在一定物种中的来源于基因复制的蛋白, 可能>会进化出新的与原来有关的功能。此次KOG注释分析是将所有鉴定到的蛋白BLAST比对KOG数据库, 得到相应的KOG注释结果。

参考文献: <https://www.ncbi.nlm.nih.gov/pubmed/14759257>

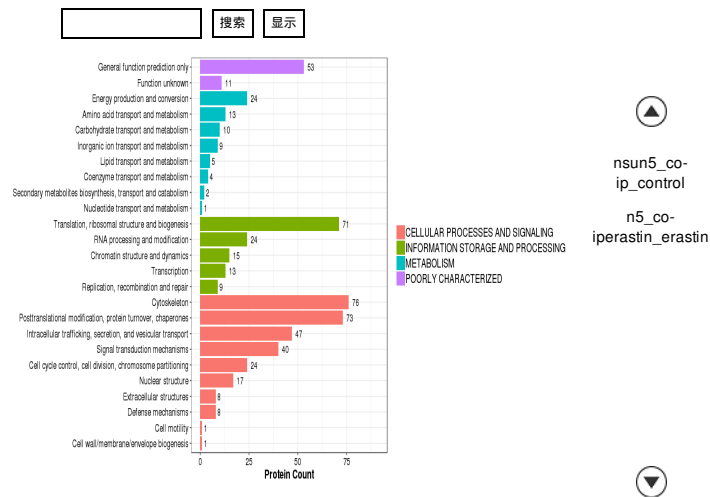

图7 KOG注释柱图。

纵坐标为KOG分类条目，横坐标为功能分类对应的蛋白数量。该图表示样品中不同功能的蛋白质的统计数量。

nsun5\_co-ip\_control样本KOG注释结果 [nsun5\_co-ip\_control\_KOG.zip]

n5\_co-iperastin\_erastin样本KOG注释结果 [n5\_co-iperastin\_erastin\_KOG.zip]

### 2.3 Pathway注释

在生物体内，不同蛋白相互协调行使其生物学行为，基于Pathway的分析有助于更进一步了解其生物学功能。KEGG是有关Pathway的主要公共数据库（Kanehisa, 2008），通过Pathway分析能确定蛋白质参与的最主要生化代谢途径和信号转导途径。

以下压缩包为相应样本Pathway注释结果（详见帮助页面中Pathway注释结果说明）：

nsun5\_co-ip\_control样本Pathway注释结果:[nsun5\_co-ip\_control\_Pathway.zip]

n5\_co-iperastin\_erastin样本Pathway注释结果:[n5\_co-iperastin\_erastin\_Pathway.zip]

## ● 分析方法

### 1 实验流程

蛋白质胶条鉴定，主要是通过凝胶电泳技术对样品蛋白质进行分离，然后分别获取胶片上不同位置的蛋白质胶条，胶内酶解后再抽提出肽段，再运用质谱技术得到这些肽段的质谱图，最后运用蛋白质鉴定软件，鉴定出样品中的蛋白质。

蛋白质胶条鉴定的主要实验步骤如下图所示：

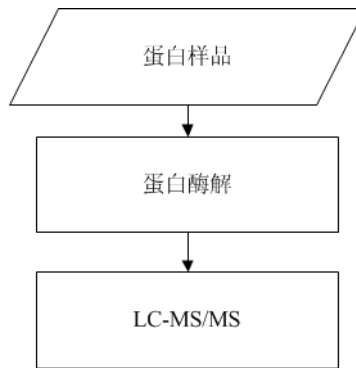

图1 蛋白胶条鉴定的实验流程。

### 1.1 蛋白酶解

- (1) 清洗脱色：考染胶用1ml脱色液（50% 乙腈+ 25mM 碳酸氢铵溶液）清洗多次，直至胶点脱色；银染胶用1ml超纯水清洗3次；
- (2) 清洗后的胶点，加入500ul乙腈脱水；
- (3) 56 条件下使用10mM DTT（二硫苏糖醇）处理胶点1小时，还原打开二硫键；
- (4) 在暗室使用55mM IAM（碘乙酰胺）处理胶点45分钟，进行半胱氨酸的烷基化封闭；
- (5) 1ug/ul的酶用25mM碳酸氢铵稀释100倍覆盖胶粒；
- (6) 冰上放置30分钟后，补加25mM碳酸氢铵溶液至覆盖胶点，37°C消化过夜；
- (7) 转移胶点外面存留的液体到新的离心管；
- (8) 用50%乙腈-水从胶点中萃取肽段一次，再用100%乙腈萃取一次；
- (9) 两次萃取的溶液和第7步的溶液合并，冷冻抽干。

### 1.2 高效液相

将抽干的肽段样品用流动相A（2% ACN，0.1%FA）复溶，20,000 g离心10 分钟后，取上清进样。通过岛津公司LC-20AD型号的纳升液相色谱仪进行分离。样品首先进入trap柱富集并除盐，随后与自装C18柱(75微米内径，3.6微米柱料粒径，15厘米柱长)串联，以300 nl/分钟流速通过如下有效梯度进行分离：0-8分钟，5%流动相B(98%ACN，0.1% FA)；8-43分钟，流动相B从8%线性升至35%；43-48分钟，流动相B从35%升至60%；48-50分钟，流动相B从60%升至80%；50-55分钟，80%流动相B；55-65分钟，5%流动相B。纳升液相分离末端直接连接质谱仪。

### 1.3 质谱检测

经过液相分离的肽段进入到ESI串联质谱仪：TripleTOF 5600(SCIEX, Framingham, MA, USA)，离子源为Nanospray III source(SCIEX, Framingham, MA, USA)，放射器为石英材料拉制的喷针(New Objectives, Woburn, MA, USA)。数据采集时，质谱仪的参数设置如下：离子源喷雾电压2,300V，氮气压力为30psi，喷雾气为15，喷雾接口处温度150摄氏度。采用高灵敏度模式进行扫描，一级质谱扫描累积时间为250ms，扫描质量范围为350-1,500Da。基于一级扫描信息，按照一级谱图中的离子强度从高到低，选择选择强度超过150cp的前30个进行碎裂并扫描二级信息，筛选

标准如下：1)m/z范围为350-1250 Da；2)电荷数目为2-5个电荷；3)母离子动态排除设置为：在一半的出峰时间内(约12s)，相同母离子的碎裂不超过2次。二级质谱的扫描累积时间为100ms。针对iTRAQ类型的数据采集，碎裂能量选择根据iTRAQ试剂调整，第二个四级杆Q2在100Da时的离子传输效率为100%。

## 2 信息分析流程

蛋白质全谱鉴定主要是通过实验串联质谱数据，与数据库模拟得到的理论质谱数据进行匹配，从而得到蛋白质鉴定结果。流程首先将原始质谱数据转换成质谱峰文件，然后与数据库中的序列进行搜索匹配。并对搜索结果作一些过滤和质量控制，给出可信的蛋白鉴定结果，具体过滤参数参考"2.3质量控制"部分。最后基于最终蛋白鉴定列表，完成GO，COG，Pathway等功能注释分析。

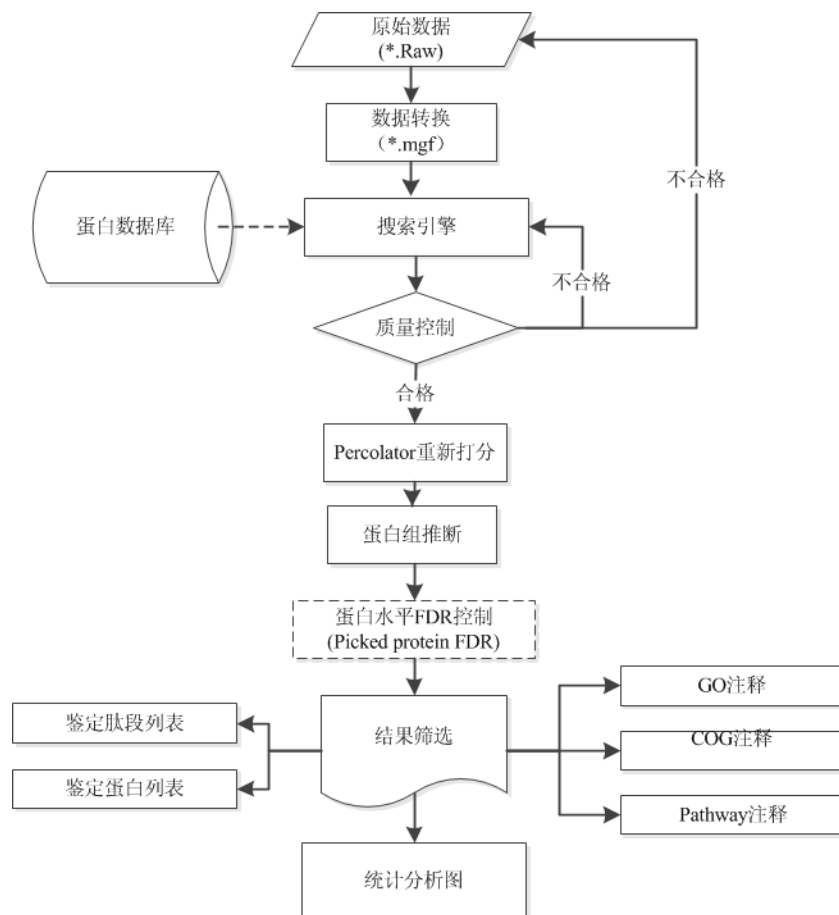

图2 蛋白全谱鉴定的信息分析流程。

### 2.1 数据库选择

数据库的选择是基于质谱数据的蛋白质鉴定策略中的重要一步，最终鉴定到的蛋白质序列都来源于被选择的数据库。

目前使用到的数据库主要可以分为三大类：

#### 1) UniProt蛋白数据库

UniProt是信息最丰富、资源最广的蛋白质数据库。它由整合Swiss-Prot、 TrEMBL 和 PIR-PSD 三大数据库的数据而成。它是经过专家校验的数据集，主要由两部分组成：UniProtKB/Swiss-Prot

(包含检查过的、手工注释的条目) 和 UniProtKB/TrEMBL (包含未校验的、自动注释的条目)。一般情况下推荐优先使用UniProtKB/Swiss-Prot子集进行相应物种的蛋白质鉴定。当需要寻找新特征序列 (如可变剪切, 新转录本) 或近源物种的鉴定时, 才考虑加入UniProtKB/TrEMBL数据库。

### 2) 基于基因组注释的蛋白数据库

主要包括NCBI和Ensembl两大基因注释系统衍生出一系列数据库。

其中NCBI系统的主要选择参考序列 (RefSeq) 计划中的蛋白数据库,这是一个非冗余的蛋白质组数据库, 由于NCBI注释系统的影响力, 该类库广泛应用于多组学关联的分析当中。NCBI的参考序列计划 (RefSeq) 将为中心法则中自然存在的分子, 从染色体到mRNA到蛋白提供参考序列标准。RefSeq标准为人类基因组的功能注解提供一个基础。它们为突变分析, 基因表达研究, 和多态发现提供一个稳定的参考点。

除此以外, NCBI还提供了非冗余蛋白质序列nr全库(non-redundant), 包括动物、植物、微生物、细菌等分类。由于该数据库来源广泛 (包含GeneBank,RefSeq,SwissProt,PDB等等), 因此除非是基因组注释不完整的物种, 抑或需要进行同源物种的搜索。否则不推荐直接利用该库进行蛋白鉴定。

Ensembl旨在开发一种能够对真核生物基因组进行自动注释(automatic annotation)并加以维护的软件。 Ensembl具有比较完整一致的基因组、转录组、蛋白质组注释信息。非常适合用于涉及多组学关联的分析。

### 3) 其它来源数据库

通常指客户提供的目标蛋白数据库, 或者指基因组转组学测序产生并denovo组装完成的新基因序列。另外还可以包含一些新特征的序列, 如可变剪切, 突变位点, 融合基因等等。

## 2.2 Mascot搜索

Mascot<sup>[1]</sup>是蛋白质组学领域重要的蛋白质鉴定软件之一, 使用广泛。该项目中使用的软件版本为Mascot2.3.02。操作时以mgf文件为原始文件, 选择已经建立好的数据库, 然后进行数据库搜索。

本项目鉴定过程中, 各参数选择如下:

表1 Mascot搜索参数<sup>o</sup> (下载)

| Item                    | Value                                                    |
|-------------------------|----------------------------------------------------------|
| Search Engine           | Mascot v2.3                                              |
| Enzyme                  | Trypsin                                                  |
| Peptide Mass Tolerance  | 0.05Da                                                   |
| Fragment Mass Tolerance | 0.1Da                                                    |
| Fixed modifications     | Carbamidomethyl (C)                                      |
| Variable modifications  | Oxidation (M); Gln->pyro-Glu (N-term Q); Deamidated (NQ) |
| Max Missed Cleavages    | 1                                                        |
| Instrument type         | ESI-QUAD-TOF                                             |
| Database                | uniprot_Rattus_norvegicus_nr.fasta (35766 sequences)     |

## 2.3 质量控制

本流程将搜索引擎产生的结果使用Percolator<sup>[2]</sup>进行预处理并重新打分, 以提高正确匹配和随

机匹配判别的准确性。然后对输出的结果以谱图水平 FDR 1%进行过滤 (PSM-level FDR  $\leq 0.01$ )，从而获得显著性鉴定的谱图和肽段列表。

接着基于“简约原则”(The parsimony principle)，本流程对肽段进行蛋白推断，并产生一系列的蛋白组。

#### 2.4 iBAQ定量

为了获得每个蛋白的iBAQ值。本流程利用华大基因自主开发的软件完成肽段XIC的提取并计算峰面积。然后基于iBAQ算法<sup>[3]</sup>，将每个蛋白组中总的峰面积除以理论能够观察到的肽段数目，从而获得最终的iBAQ值。

### ● 帮助

#### 1 mgf数据格式说明

在生物信息分析中，质谱原始文件需要转换成mgf格式(sample.mgf)后才能被使用。mgf文件主要包含了二级质谱 (MS/MS) 谱图的信息，其基本格式如下：

```
BEGIN IONS
TITLE=Spectrum1 scans:2,
PEPMASS=588.84003 11629.05371
CHARGE=2+
RTINSECONDS=0
SCANS=2
115.55481 258.814
116.11040 496.234
136.94980 420.235
173.90498 377.256
180.86188 368.726
190.94720 352.431
.....
END IONS
```

其中“BEGIN IONS”和“END IONS”是每一张谱的开始和结束位置，“TITLE”为该谱图的编号信息，“PEPMASS”为母离子质荷比和强度值，“CHARGE”为母离子所带电荷数，“RTINSECONDS”为保留时间，“SCANS”为扫描编号，其余各行为肽段经碎裂后的子离子质荷比值和强度信息。

更多关于mgf格式的说明，请访问网址  
[http://www.matrixscience.com/help/data\\_file\\_help.html](http://www.matrixscience.com/help/data_file_help.html)。

#### 2 数据目录编排说明

由于报告展示篇幅有限，完整的数据可通过网页报告侧边栏“文件--Download the Files”下载至本地。各主要目录结果的编排及说明如下图：

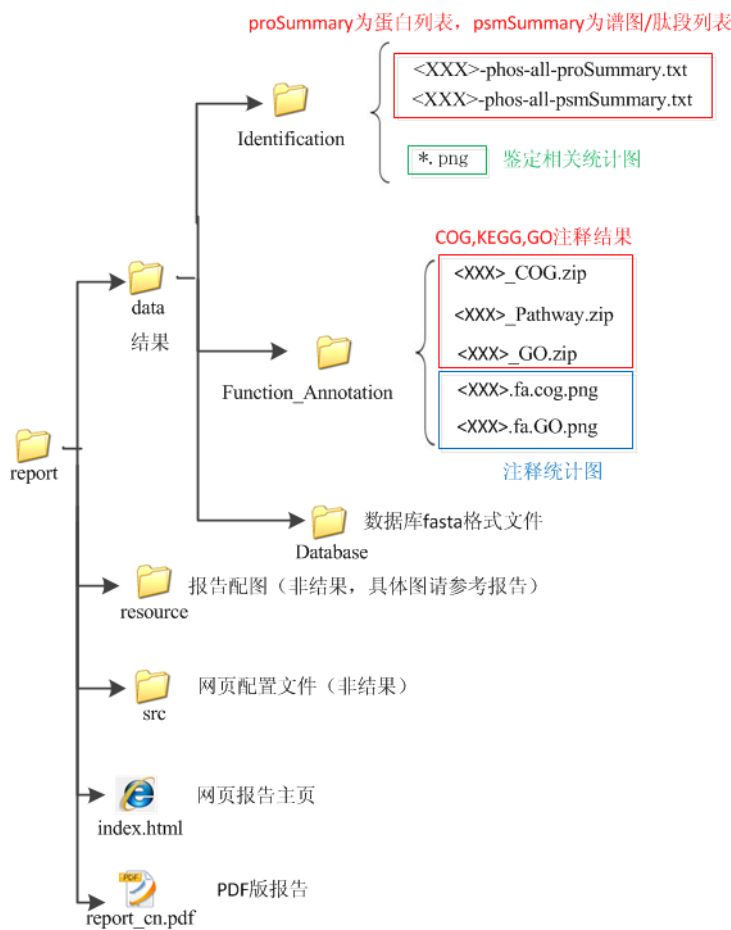

图1 结果目录结构。

### 3 蛋白质序列FASTA格式

基于文本的FASTA格式文件用于存储记录DNA或是蛋白质序列信息。序列文件的第一行以符号">"开头, 紧接着序列ID, 之后可以跟随序列注释信息。第二行为第一行ID对应的DNA碱基序列或者蛋白质氨基酸序列。FASTA文件可用写字板直接打开查看。

举例如下:

```

>tr|F2N3W2|F2N3W2_PSEU6 Quinoprotein alcohol dehydrogenase OS=Pseudomonas stutzeri (strain DSM 4166 / CMT.9.A) GN=PSTAA_2293 PE=4 SV=1
MKHTGLRKPFAVTALCAAVAMSSLHAWAVTDQEILNDAKSTDQIVTNGGLQGQRYSTLD
ALNTNNINQLRPVWGFSLGGEKQRGQEAQPLIKDGVMYITGSYSRVYALDARTGKELWQ
YDARLPDGIMPCCDVINRGVALYDDLVIKGLDAKLVALNKDTGKVVWKKTVADYKAGY
SLTAAPLVVN
    
```

### 4 peptideSummary文件格式说明

该文件包含本次项目所有样本鉴定到的谱图和肽段相关信息。每列以tab符号分隔, 可使用Excel打开。

表1 谱图和肽段信息格式说明 (下载)



| Field        | Description                          |
|--------------|--------------------------------------|
| query_number | 谱图号                                  |
| peptide_seq  | 肽段序列                                 |
| PSM_FDR      | 谱图水平FDR, 即通常文章中所指的"蛋白FDR" (非蛋白水平FDR) |
| ions_score   | 谱图匹配得分                               |
| Protein_ID   | 相应蛋白ID                               |

## 5 proteinSummary文件格式说明

该文件记录了样品鉴定到的蛋白质的信息列表。每列以tab符号分隔, 可使用Excel打开。

表2 蛋白信息格式说明 (下载)

| Field              | Description                                                         |
|--------------------|---------------------------------------------------------------------|
| Group_ID           | 蛋白组序号                                                               |
| Protein_ID         | 蛋白组首ID                                                              |
| Protein_Qscore     | 蛋白得分                                                                |
| Protein_FDR        | 根据Protein_Qscore计算获得的蛋白水平FDR(只有启用Protein-level FDR过滤模式本列才有值, 否则为NA) |
| Protein_Mass       | 蛋白质量                                                                |
| PeptideSeqs        | 蛋白中鉴定到的肽段序列 (以;分开)                                                  |
| PeplsUnique        | 与PeptideSeqs列中一一对应的肽段是否为Unique肽段, 1为Unique,0为非Unique.               |
| Unique_Peptide_Num | 该蛋白组中Unique肽段数目。                                                    |
| Unique_Spectra_Num | 该蛋白组中Unique谱图数目。                                                    |
| Coverage           | 蛋白覆盖度                                                               |
| Peptide_Query      | 支持该蛋白组的谱图号                                                          |
| Sameset            | 蛋白组中其余蛋白ID                                                          |
| Description        | 蛋白描述                                                                |
| Abundance          | 蛋白丰度值 (需要启用iBAQ定量才有这栏)                                              |
| iBAQ               | 蛋白iBAQ定量值 (需要启用iBAQ定量才有这栏)                                          |

## 6 GO功能注释说明

GO功能注释结果打包于各样品目录下的sample\_GO.zip压缩包中, sample.fa.GO.png为GO分类图文件, sample.fa.GO2protein.xls为GO分类文件(GO条目与蛋白质的对应关系), 该文件可以使用Excel打开。

|   | A                  | B                     | C            | D               | E                         | F |
|---|--------------------|-----------------------|--------------|-----------------|---------------------------|---|
| 1 | Ontology           | Class                 | number_of_Nb | proteins_of_Nb; |                           |   |
| 2 | biological_process | biological regulation |              | 101             | Niben101Scf03422g01002.1; |   |

图2 GO2protein示例图。

表3 GO2protein格式说明 (下载)

| Field         | Description                                                           |
|---------------|-----------------------------------------------------------------------|
| Ontology      | GO本体的类别(biological_process 或 cellular_component 或 molecular_function) |
| Class         | GO条目                                                                  |
| number_of_*   | 注释到各GO条目中的蛋白质数量                                                       |
| Proteins_of_* | 注释到各GO条目蛋白质ID                                                         |

而sample.fa.protein2GO.xls 中为 GO 注释（蛋白质与 GO 条目的对应关系）文件，该文件可以使用 Excel 打开。

|   | A                        | B          | C          | D |
|---|--------------------------|------------|------------|---|
| 1 | Niben101Ctg05133g00002.1 | GO:0008614 | GO:0009108 |   |

图3 protein2GO示例图。

表4 protein2GO格式说明（下载）

| Field  | Description |
|--------|-------------|
| 第一列    | 蛋白质ID       |
| 第二列及以后 | GO ID       |

## 7 COG功能注释说明

COG注释结果打包于各样品目录下的sample\_COG.zip压缩包中，sample.cog2protein.xls为COG分类文件（COG 条目与蛋白质的对应关系），该文件可以使用 Excel 打开。

|   | A    | B                       | C              | D                      | E |
|---|------|-------------------------|----------------|------------------------|---|
| 1 | Code | Functional-Categories   | Protein-Number | Proteins               |   |
| 2 | A    | RNA processing and modi |                | 1 Niben101Scf07457g0   |   |
| 3 | B    | Chromatin structure and |                | 3 Niben101Scf07457g0   |   |
| 4 | C    | Energy production and c |                | 124 Niben101Scf07457g0 |   |

图4 COG2protein示例图。

表5 COG2protein格式说明（下载）

| Field                 | Description       |
|-----------------------|-------------------|
| Code                  | COG功能代号           |
| Functional-Categories | COG功能分类           |
| Protein-Number        | 蛋白质在各COG功能分类的数量   |
| Proteins              | 蛋白质在各COG功能分类的序列ID |

而sample.protein2COG.xls 中为COG注释（蛋白质与COG条目的对应关系）文件，该文件可以使用 Excel 打开。

|   | A            | B                 | C     | D        | E       | F                    | G    | H                     | I |
|---|--------------|-------------------|-------|----------|---------|----------------------|------|-----------------------|---|
| 1 | Protein      | Protein-or-Domain | Score | E-Value  | COG-ID  | Function-Description | Code | Functional-Categories |   |
| 2 | Niben101Scf1 | CT539             | 95.1  | 3.00E-20 | COG0526 | Thiol-disulfide iOC  |      | Posttranslational mod |   |
| 3 | Niben101Scf1 | CPn0659           | 93.2  | 1.00E-19 | COG0526 | Thiol-disulfide iOC  |      | Posttranslational mod |   |

图5 protein2COG示例图。

表6 protein2COG格式说明（下载）

| Field                 | Description     |
|-----------------------|-----------------|
| Protein               | 蛋白质序列的名称        |
| Protein-or-Domain     | 比对上的蛋白或结构域      |
| Score                 | blast比对的得分      |
| E-Value               | blast比对的E-value |
| COG-ID                | COG的ID          |
| Function-Description  | 功能描述            |
| Code                  | COG功能代号         |
| Functional-Categories | COG功能分类         |

## 8 Pathway通路注释说明

Pathway结果打包于各样品目录下的sample\_Pathway.zip压缩包中，sample.ko为蛋白ID及对应KO号列表文件（该文件可以选择 Excel用打开，也可以用终端less命令查看）。

|    | A                        | B                                            | C | D      | E                 | F           |
|----|--------------------------|----------------------------------------------|---|--------|-------------------|-------------|
| 1  | # Method: ELAST          | Condition: expect <= 1e-100; rank <= 5       |   |        |                   |             |
| 2  | # Summary:               | 147 succeed, 722 fail                        |   |        |                   |             |
| 3  |                          |                                              |   |        |                   |             |
| 4  | # query                  | ko_id:rank:eval:score:identity:ko_definition |   |        |                   |             |
| 5  | Niben101Ctg05133g00002.1 |                                              |   |        |                   |             |
| 6  | Niben101Ctg08688g00001.1 |                                              |   |        |                   |             |
| 7  | Niben101Ctg12954g00001.1 |                                              |   |        |                   |             |
| 8  | Niben101Ctg13092g00001.1 |                                              |   |        |                   |             |
| 9  | Niben101Ctg14629g00001.1 |                                              |   |        |                   |             |
| 10 | Niben101Ctg15034g00003.1 |                                              |   |        |                   |             |
| 11 | Niben101Ctg16053g00004.1 | K13811                                       | 1 | 3e-117 | 424 mze:101464984 | EC[not_get] |
| 12 | Niben101Ctg16210g00007.1 | K08912                                       | 1 | 6e-110 | 399 rrr:104672455 | EC[not_get] |
| 13 | Niben101Ctg16210g00008.1 |                                              |   |        |                   |             |
| 14 | Niben101Scf00022g06009.1 |                                              |   |        |                   |             |

图6 \*.ko示例图。

表7 \*.ko格式说明（下载）

| Field | Description    |
|-------|----------------|
| 第一至三行 | 分析过程信息说明       |
| 第一列   | 蛋白             |
| 第二列   | KEGG Orthology |

sample.path 为蛋白的 Pathway 列表文件（该文件可以选择 Excel用打开，也可以用终端less命令查看）。

|    | A                    | B         | C          | D                | E             |
|----|----------------------|-----------|------------|------------------|---------------|
| 1  | #Pathway             | Count (14 | Pathway ID | Proteins         | KOs           |
| 2  | Metabolic pathways   | 83        | ko01100    | Niben101CK13811+ | K00600+K00600 |
| 3  | Biosynthesis of seco | 52        | ko01110    | Niben101SK00600+ | K00600+K00600 |
| 4  | Microbial metabolism | 47        | ko01120    | Niben101CK13811+ | K00600+K00600 |
| 5  | Biosynthesis of anti | 47        | ko01130    | Niben101CK13811+ | K00600+K00600 |
| 6  | Carbon metabolism    | 38        | ko01200    | Niben101SK00600+ | K00600+K00600 |
| 7  | Biosynthesis of amin | 25        | ko01230    | Niben101SK00600+ | K00600+K00600 |
| 8  | Glyoxylate and dicar | 18        | ko00630    | Niben101SK00600+ | K00600+K00600 |
| 9  | Glycolysis / Glucone | 17        | ko00010    | Niben101SK00128+ | K00128+K00128 |
| 10 | Pyruvate metabolism  | 13        | ko00620    | Niben101SK00026+ | K00026+K00026 |

图7 \*.path示例图。

表8 \*.path格式说明（下载）

| Field      | Description               |
|------------|---------------------------|
| Pathway    | 通路名                       |
| Count      | 注释到该通路的蛋白质的数目             |
| Pathway ID | KEGG数据库中的Pathway ID       |
| Proteins   | 注释到该Pathway的蛋白            |
| KOs        | 属于该Pathway的KEGG Orthology |

sample\_map文件夹中包含蛋白的 Pathway图文件。sample.htm为蛋白的Pathway分析结果文件,用浏览器打开查看。

1. Nb

| #  | Pathway                                                      | Diff Proteins with pathway annotation (147) | Pathway ID |
|----|--------------------------------------------------------------|---------------------------------------------|------------|
| 1  | <a href="#">Metabolic pathways</a>                           | 83 (56.46%)                                 | ko01100    |
| 2  | <a href="#">Biosynthesis of secondary metabolites</a>        | 52 (35.37%)                                 | ko01110    |
| 3  | <a href="#">Microbial metabolism in diverse environments</a> | 47 (31.97%)                                 | ko01120    |
| 4  | <a href="#">Biosynthesis of antibiotics</a>                  | 47 (31.97%)                                 | ko01130    |
| 5  | <a href="#">Carbon metabolism</a>                            | 38 (25.85%)                                 | ko01200    |
| 6  | <a href="#">Biosynthesis of amino acids</a>                  | 25 (17.01%)                                 | ko01230    |
| 7  | <a href="#">Glyoxylate and dicarboxylate metabolism</a>      | 18 (12.24%)                                 | ko00630    |
| 8  | <a href="#">Glycolysis / Gluconeogenesis</a>                 | 17 (11.56%)                                 | ko00010    |
| 9  | <a href="#">Pyruvate metabolism</a>                          | 13 (8.84%)                                  | ko00620    |
| 10 | <a href="#">Citrate cycle (TCA cycle)</a>                    | 13 (8.84%)                                  | ko00020    |

图8 \*.htm示例图。

表9 \*.htm格式说明 (下载)

| Field                                 | Description                      |
|---------------------------------------|----------------------------------|
| Pathway                               | 通路名, 点击可看到注释到该通路的各蛋白质情况及Pathway图 |
| Diff Proteins with pathway annotation | 鉴定的蛋白质注释到该通路的数目及比例               |
| Pathway ID                            | KEGG数据库中的Pathway ID              |

## ● 常见问题

蛋白鉴定列表中Protein\_FDR那列的值是NA意味着什么？

通常对于蛋白鉴定数目较多的项目, 为了保证结果的严谨性, 我们利用Picked protein FDR算法重新计算蛋白FDR, 从蛋白水平更严格的进行鉴定结果的筛选, 此时Protein\_FDR列会有相应的FDR值。而对蛋白鉴定数目较少的项目(比如胶条鉴定), 通常我们只进行谱图水平的FDR控制, 此时过滤阈值会比较宽松, 保证鉴定数目不致过少, 因此, 此时的Protein\_FDR列不会有相应的值, 相应只会显示NA。

## ● 参考文献

- [1] Perkins, D. N.; Pappin, D. J.; Creasy, D. M.; Cottrell, J. S., Probabilitybased protein identification by searching sequence databases using mass spectrometry data. Electrophoresis 1999, 20, 35513567.
- [2] Lukas Käll, Jesse Canterbury, Jason Weston, William Stafford Noble and Michael J. MacCoss. "Semi-supervised learning for peptide identification from shotgun proteomics datasets." Nature Methods. 4(11):923-925,2007.
- [3] Schwanhäusser B, Busse D, Li N, Dittmar G, Schuchhardt J, Wolf J, Chen W, Selbach M: Global quantification of mammalian gene expression control. Nature 2011, 473: 337–342.

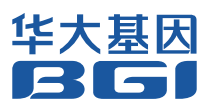

基因科技造福人类

## 联系我们

服务热线: 400-706-6615

网址: [www.bgitecholutions.com](http://www.bgitecholutions.com)

邮 箱: [info@bgitecholutions.com](mailto:info@bgitecholutions.com)

地址: 广东省深圳市盐田区北山工业区11栋 (邮编: 518083)

本结题报告仅供客户学习、交流和研究使用, 请勿用于商业用途, 违者必究。

版权声明: 本结题报告版权属于深圳华大基因股份有限公司所有, 未经本公司书面许可, 任何其他个人或组织均不得以任何形式将本结题报告中的各项内容进行复制、拷贝、编辑或翻译为其他语言。本结题报告中的所有商标或标志均属于深圳华大基因股份有限公司及其提供者所有。  
2017年01月
