# Supplementary material for: The NSUN5-FTH1/FTL pathway mediates ferroptosis in bone marrow-derived mesenchymal stem cells
Source: PubMed Central journal article supplement (PMC8898311; doi:10.1038/s41420-022-00902-z), 2022-03-05
Supplement: 41420_2022_902_MOESM6_ESM.pdf [file 41420_2022_902_MOESM6_ESM.pdf]

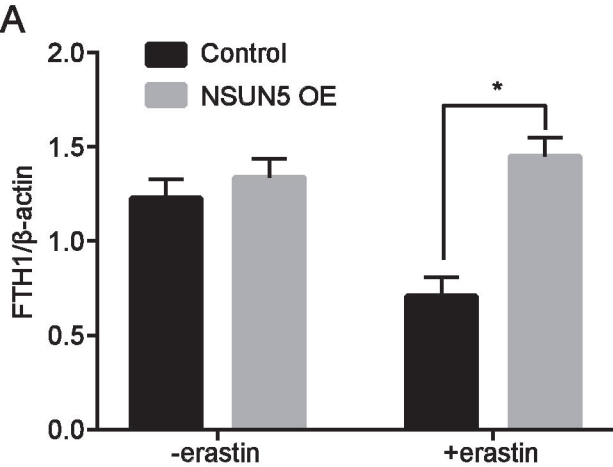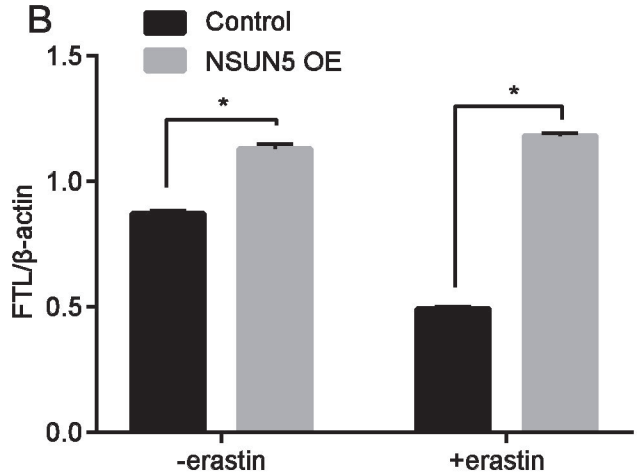

The quantify of figure 5 C

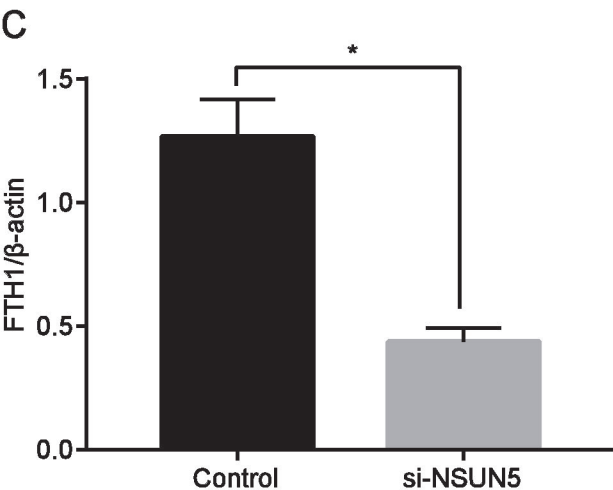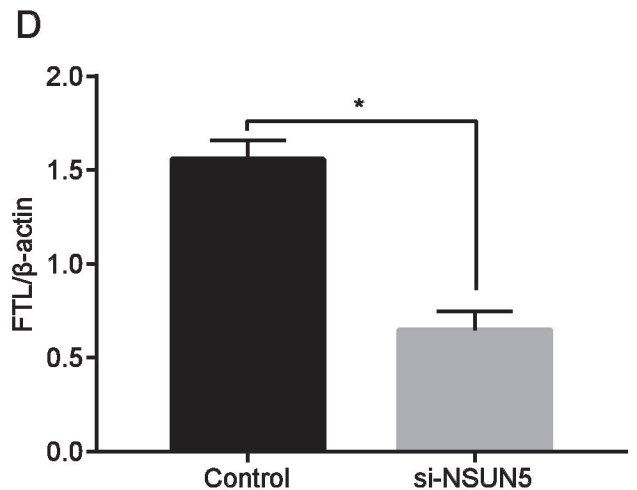

The quantify of figure 5 D
