# Supplementary material for: The NSUN5-FTH1/FTL pathway mediates ferroptosis in bone marrow-derived mesenchymal stem cells
Source: PubMed Central journal article supplement (PMC8898311; doi:10.1038/s41420-022-00902-z), 2022-03-05

**A**

Input IgG IP:NSUN5

IB: Trap1

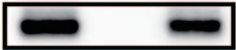

Input IgG IP:Trap1

IB: NSUN5

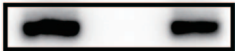

Supplement: 41420_2022_902_MOESM10_ESM.pdf [file 41420_2022_902_MOESM10_ESM.pdf]
